# Supplementary material
Source: publisher site journal article supplement (https://www.spandidos-publications.com/8390/downloadSupplementary)

Figure S1. Gene expression of CAF markers. CAF, cancer-associated fibroblast.

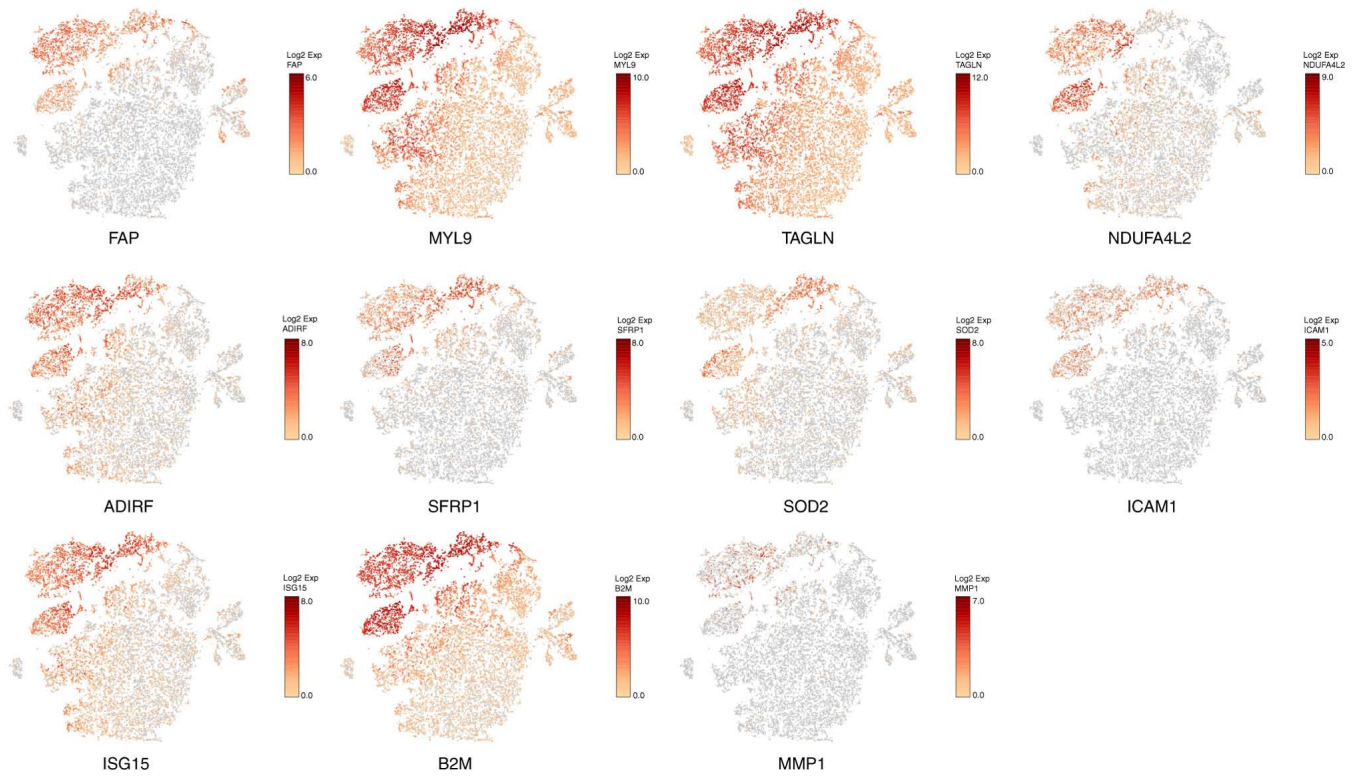

Figure S2. (A) Correlation of copy numbers in CRC for CDK4 and MDM2. (B) Correlation of copy numbers in CRC for VDR and PTHrP. (C) Correlation of copy numbers in CRC for VDR and KRAS. VDR, vitamin D receptor; PTHrP, parathyroid hormone-related protein; KRAS, Kirsten rat sarcoma viral oncogene homolog.

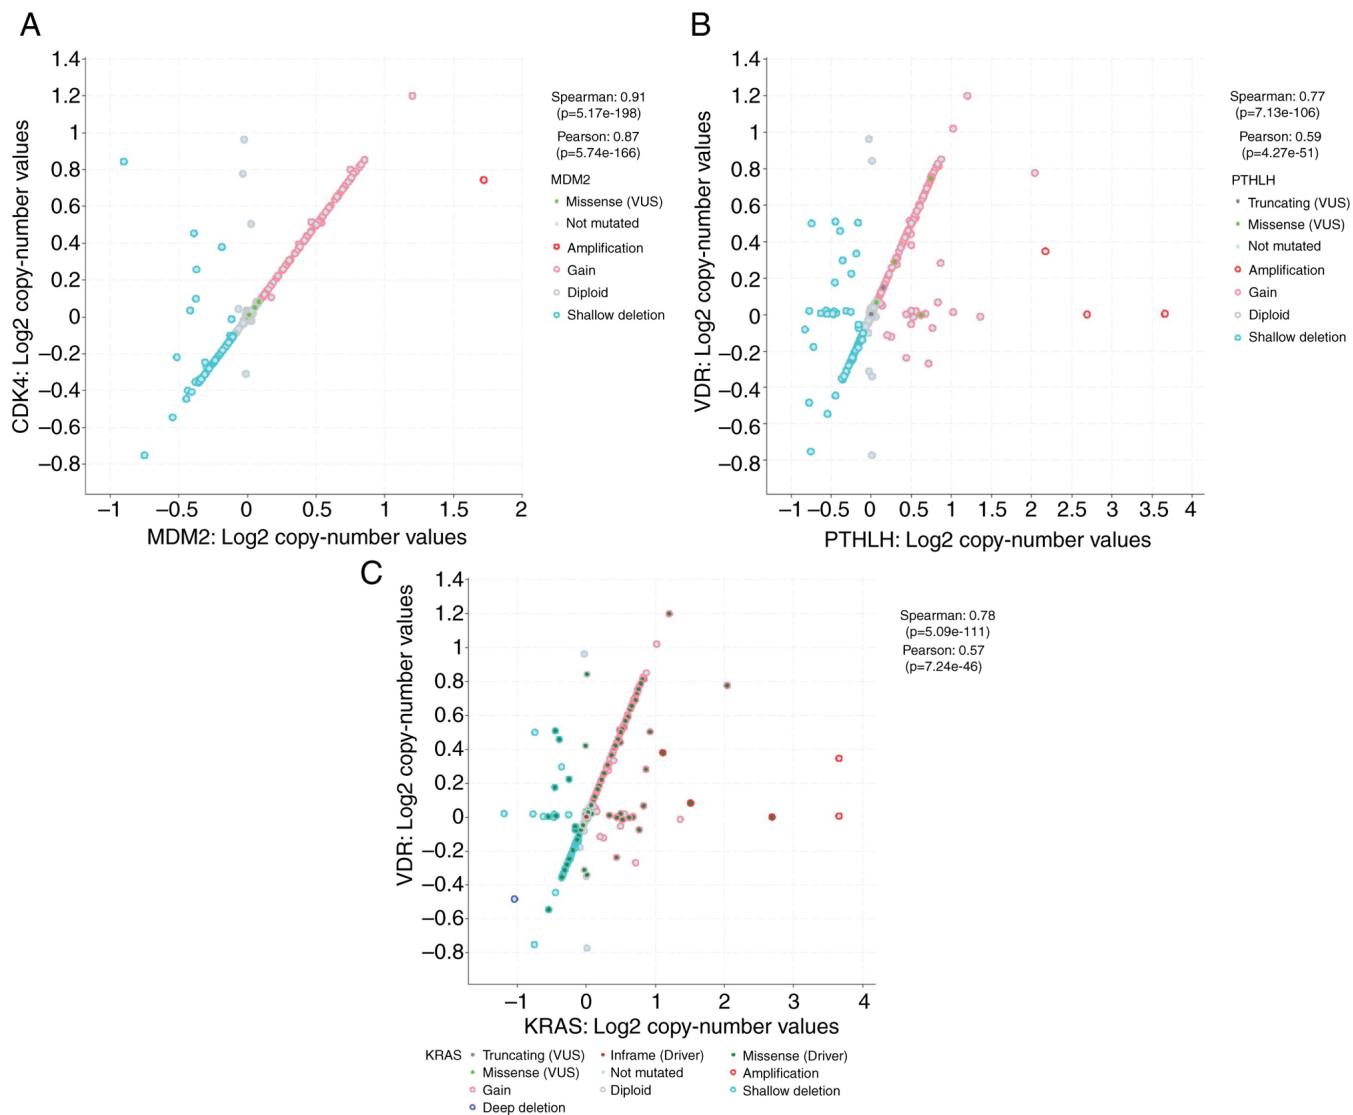

Supplement: Supplementary file 1 [file downloadSupplementary]
